# Supplementary material
Source: PubMed Central journal article supplement (PMC3837089)

**Supplemental Figure 1. LPS induces TLR4 dependent HSPC expansion. A)**

Representative flow plots of BM LSK 24 hours after PBS or LPS injection. % of **B)** LSK and **C)** LT-HSC (CD150<sup>+</sup>CD135<sup>-</sup>LSK) and ST-HSC (CD150<sup>-</sup>CD135<sup>+</sup> LSK) expansion in C3H/HeOuJ and C3H/HeJ mice following intraperitoneal injection of 5 µg of LPS; **D)** % LSK expansion in B6, MyD88<sup>-/-</sup>, and TRIF<sup>-/-</sup> mice; or **E)** SEV129 mice and IFNAR<sup>-/-</sup> mice 24 hours following intraperitoneal injection of 5 µg of LPS. \*p<0.05 for PBS vs LPS. \*\* p<0.05 for wild type LPS treated versus knockout LPS treated mouse. Experiments were performed at least 3 separate times with an n=3-4 per group.

**Supplemental Figure 2. LT-HSCs from septic mice are capable of long term**

**reconstitution. A)** Schema for identification of Lineage<sup>-</sup>c-kit<sup>+</sup>sca-1<sup>+</sup> LSK and CD150<sup>+</sup>CD135<sup>-</sup> LT-HSCs and CD150<sup>-</sup>CD135<sup>+</sup> activated ST-HSCs 36 hours after sham or CLP surgery. **B)** Gating schema for sorting of LT-HSCs 36 hours after sham or CLP for long term reconstitution experiment with FACSARIA following magnetic sorting for lineage-depletion showing pre-sort (top panels) and **C)** post-sort purities. **D)** Survival of lethally irradiated mice following transfer of ten CD150<sup>+</sup>CD135<sup>-</sup>LSK cells from sham (n=7) or CLP (n=7) mice with 5x10<sup>5</sup> Lineage<sup>+</sup> cells for radioprotection, or 5x10<sup>5</sup> Lineage<sup>+</sup> cells without CD150<sup>+</sup>CD135<sup>-</sup>LSK cells (n=10).

**Supplemental Figure 3. CLP-induced bone marrow reprogramming of**

**hematopoiesis involves depletion of B cells and increased myeloid differentiation**

**of hematopoietic progenitors. A)** Time course of bone marrow B cell depletion

following CLP. Representative flow plots of AA4.1<sup>+</sup>B220<sup>low</sup> pre-B cells 36 hours after sham treatment (left panels) and CLP treatment (right panels) in **B)** B6 control and **C)** MyD88<sup>-/-</sup> mice with graphical representations (bottom panels) of % pre-B cells in bone

marrow at 36 hours or Day 7 following sham or CLP treatment. D) 36 hours following sham or CLP treatment, total Lineage<sup>-</sup> hematopoietic stem and progenitor cells were isolated by magnetic bead sorting and  $1 \times 10^4$  Lineage<sup>-</sup> cells were cultured in methylcellulose with the indicated cytokines. 14 days later, colonies were counted with a light microscope. Each point represents Lineage<sup>-</sup> cells from two mice of the same treatment group. All experiments were performed at least twice with an n=4 per group.

**Supplemental Figure 4. Blockade of inflammatory factors that regulate hematopoiesis have no effect on CLP induced LSK expansion.** 36 hours following sham or CLP procedure BM was analyzed for LSK expansion. **A)** C57BL/6, IL1R<sup>-/-</sup> and IL-6<sup>-/-</sup> animals. **B)** Sham or CLP mice with or without treatment with pegylated soluble TNFR1 (100 mg/kg). **C)** C57BL/6 sham and CLP mice with or without treatment with apocynin (apo-5mg/kg) and n-acetyl cysteine (NAC-100mg/kg). **D)** C57BL/6 sham and CLP mice treated with or without indomethacin (5mg/kg). All treatments were given i.p. 2 hours prior to surgery. Apo+NAC and TNFR1 were also given 24 hours following CLP.

**Supplemental Figure 5. Staphylococcal superantigen induces HSPC expansion and S. aureus sepsis induces a temporary leukopenia.** **A)** Expansion of LSK, LT-HSCs and ST-HSCs in B6 mice treated IP with 10 $\mu$ g of Staphylococcal enterotoxin B (SEB) or same volume of PBS as control. **B)** represents peripheral blood total leukocyte counts.

**Supplemental Figure 6. Time course of BM repopulation following CLP.** Mice were subjected to Sham or CLP and at different time points hind limb bones were harvested

for H&E staining. All micrographs are 100x magnification. **A)** At 12 hours, there is increased dilatation of BM vasculature and increased space from cell loss is beginning. **B)** By 36 hours after CLP, BM space is maximal and there is continued dilatation of the BM vasculature. **C)** 96 hours after CLP, there is continued BM space but the BM vasculature has returned to normal. **D)** By Day 7, the BM has completely regained cellularity with dramatically increased myeloid elements. **E)** Time course of the total BM cellularity following sham or CLP \*  $p < 0.05$  control vs treatment by Student's t-test. Experiments were performed three independent times with at least  $n=3$  per group. Figure represents data from one experiment.

**Supplemental Figure 7. Expansion of total cell numbers in response to CLP or *S. aureus* from selected experiments.** Total cell counts for LSK, LT-HSC, and ST-HSCs were calculated. **A)** Total cell number expansion of LT-HSC and ST-HSC in Sham and CLP treated WT (C57BL/6) mice, 36 hours after surgery (experiment from Figure 1 B and C). **B)** Total cell number expansion of LSK, LT-HSC and ST-HSC in WT, MyD88<sup>-/-</sup> and TRIF<sup>-/-</sup> mice 36 hours after Sham or CLP (experiment from Figure 2B). **C)** Total cell number expansion of LSK, LT-HSC and ST-HSC in WT versus MyD88<sup>-/-</sup>TRIF<sup>-/-</sup> (DKO) mice 36 hours after IV infection with  $5 \times 10^6$  SA (experiment from Figure 2D). **D)** Total cell number expansion of LSK, LT-HSC and ST-HSC in Rag1<sup>-/-</sup> mice 36 hours after IV infection with  $5 \times 10^6$  SA (experiment from Figure 2E). \*  $p < 0.05$ ,  $\mp p < 0.001$  by Student's t test or one way ANOVA.

Supplemental Figure 1

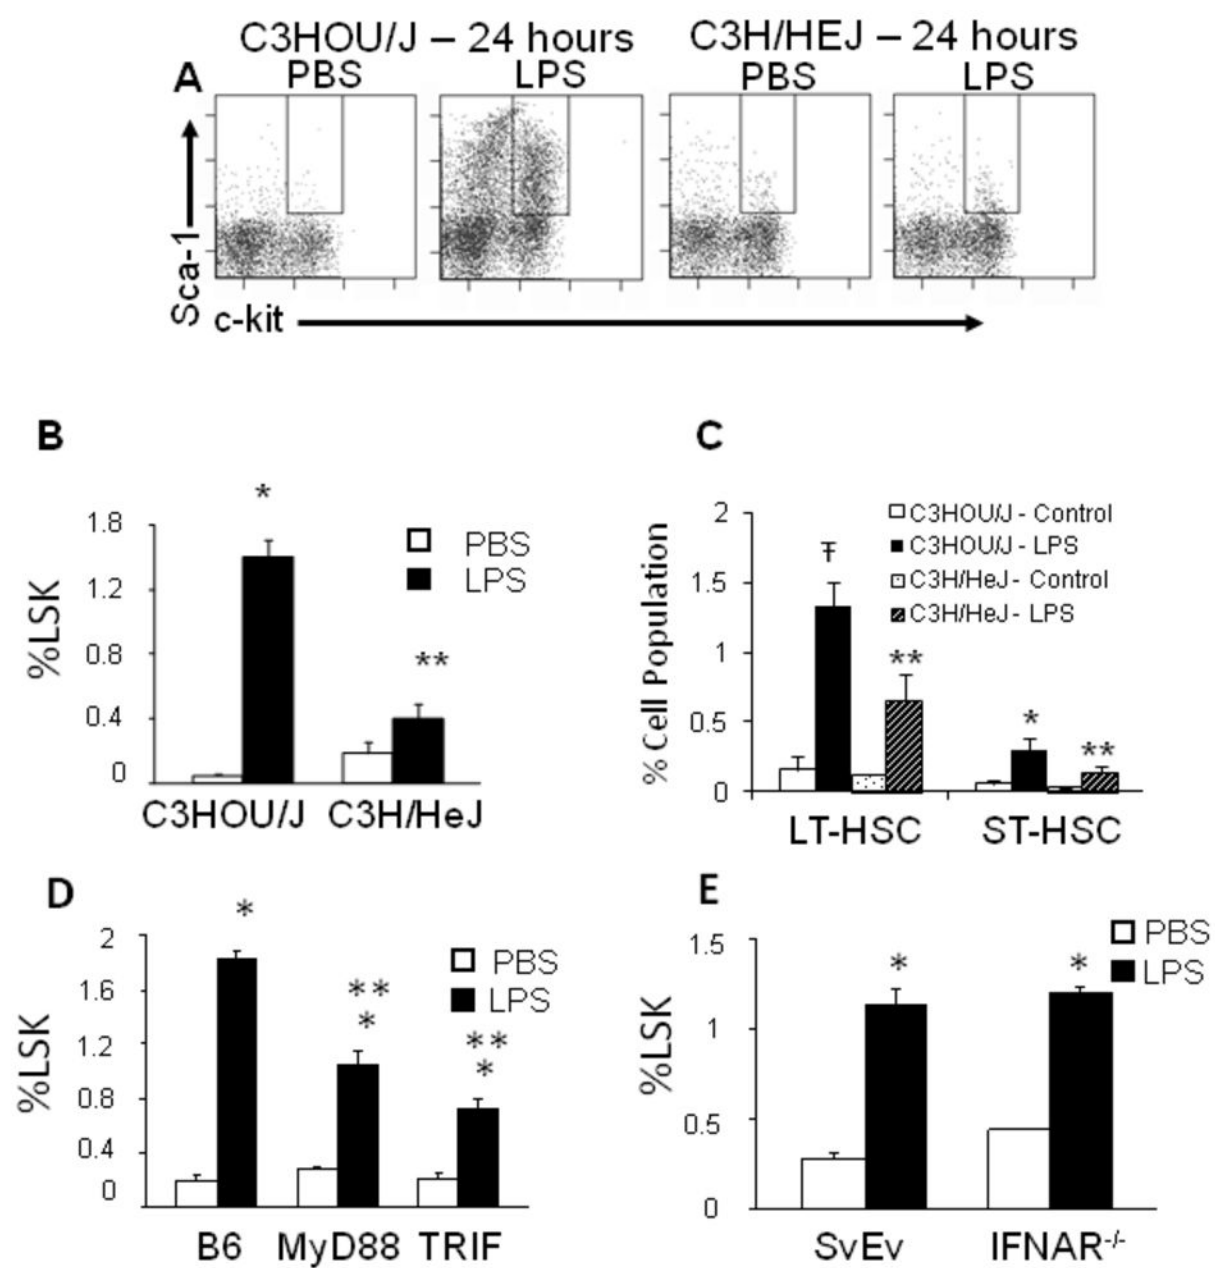

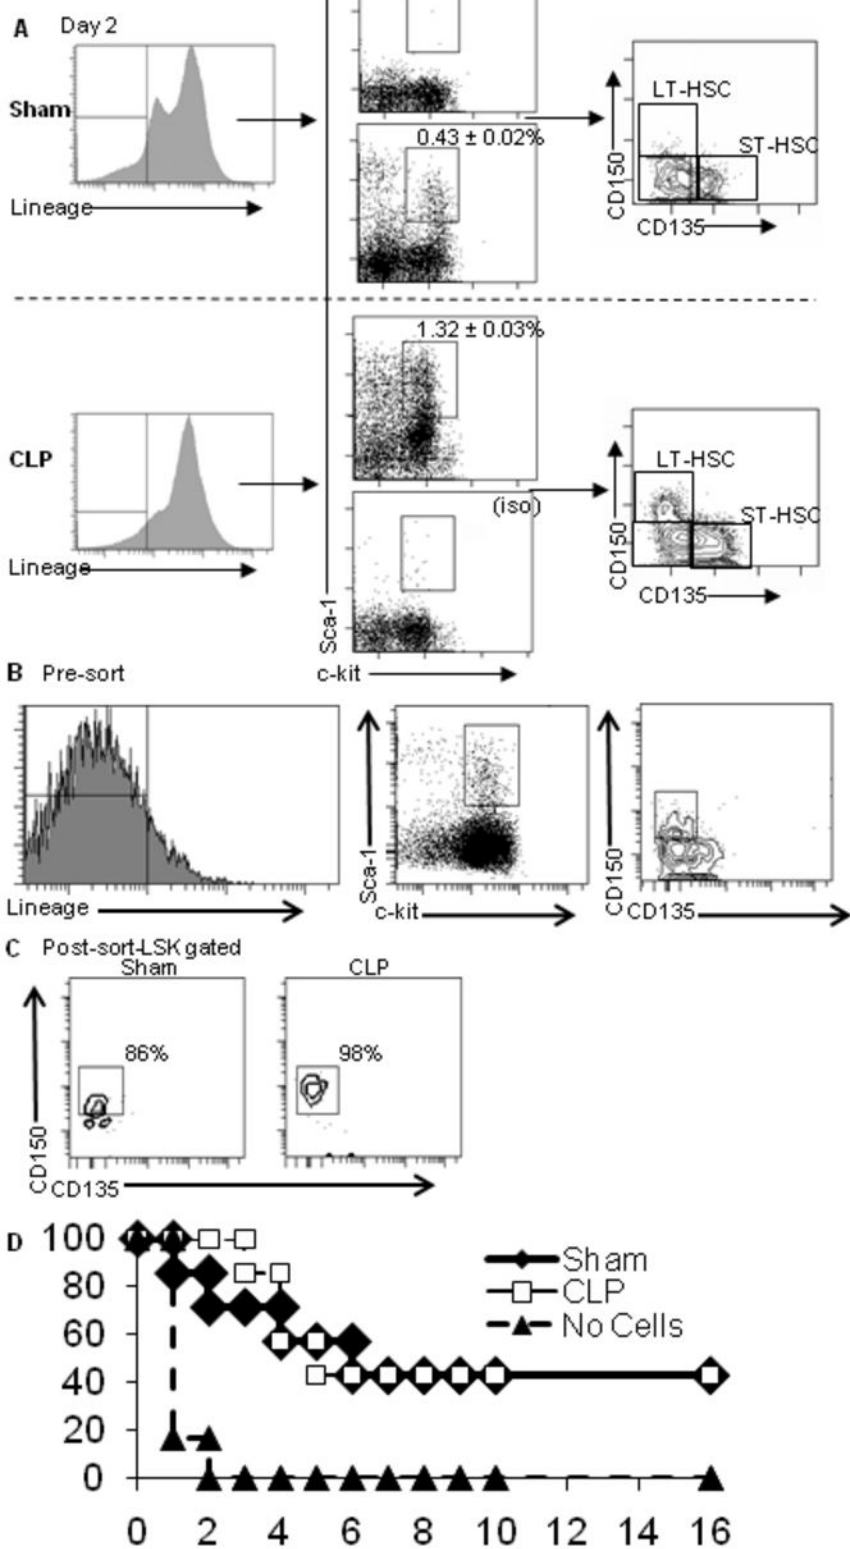

**A****C57Bl/6 Total BM B cells**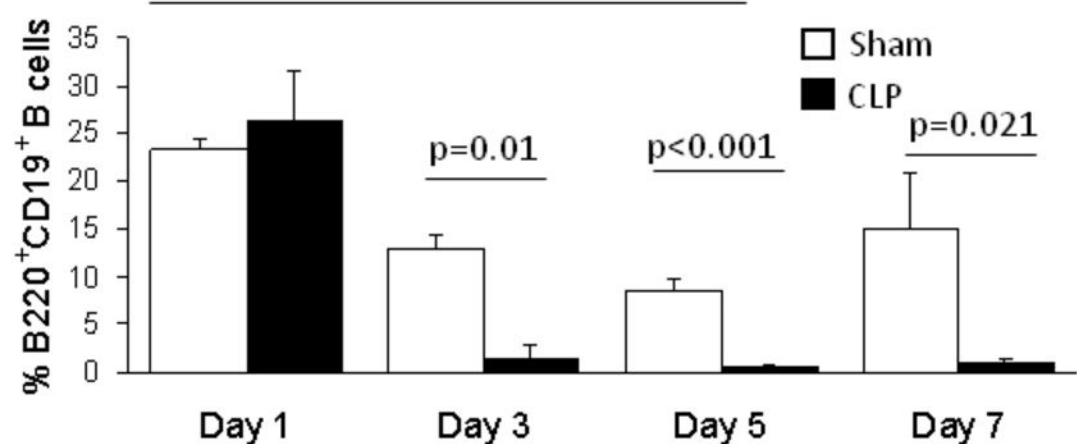**B****C57Bl/6 Day 2**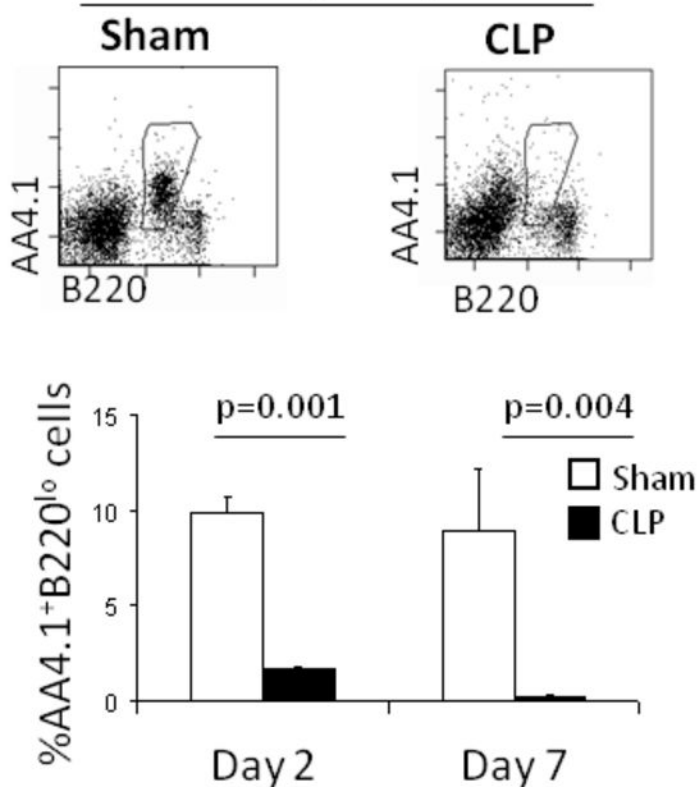**C****MyD88<sup>-/-</sup> Day 2**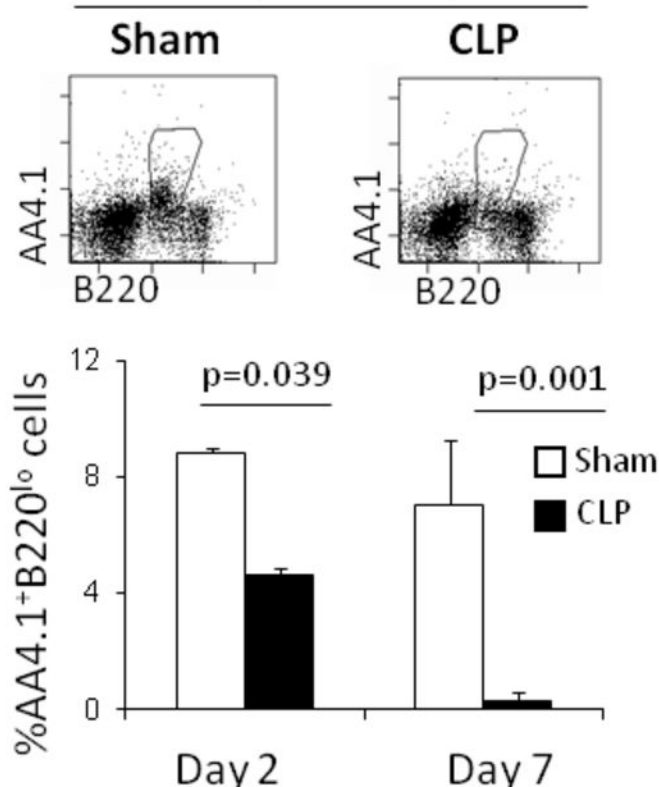**D**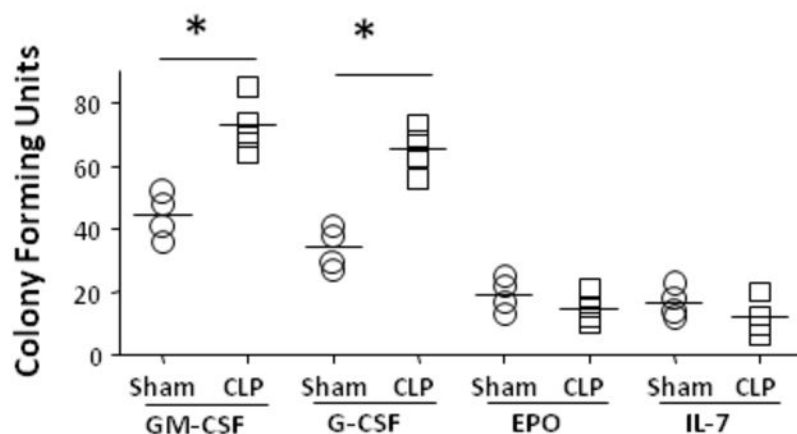

Supplemental Figure 4

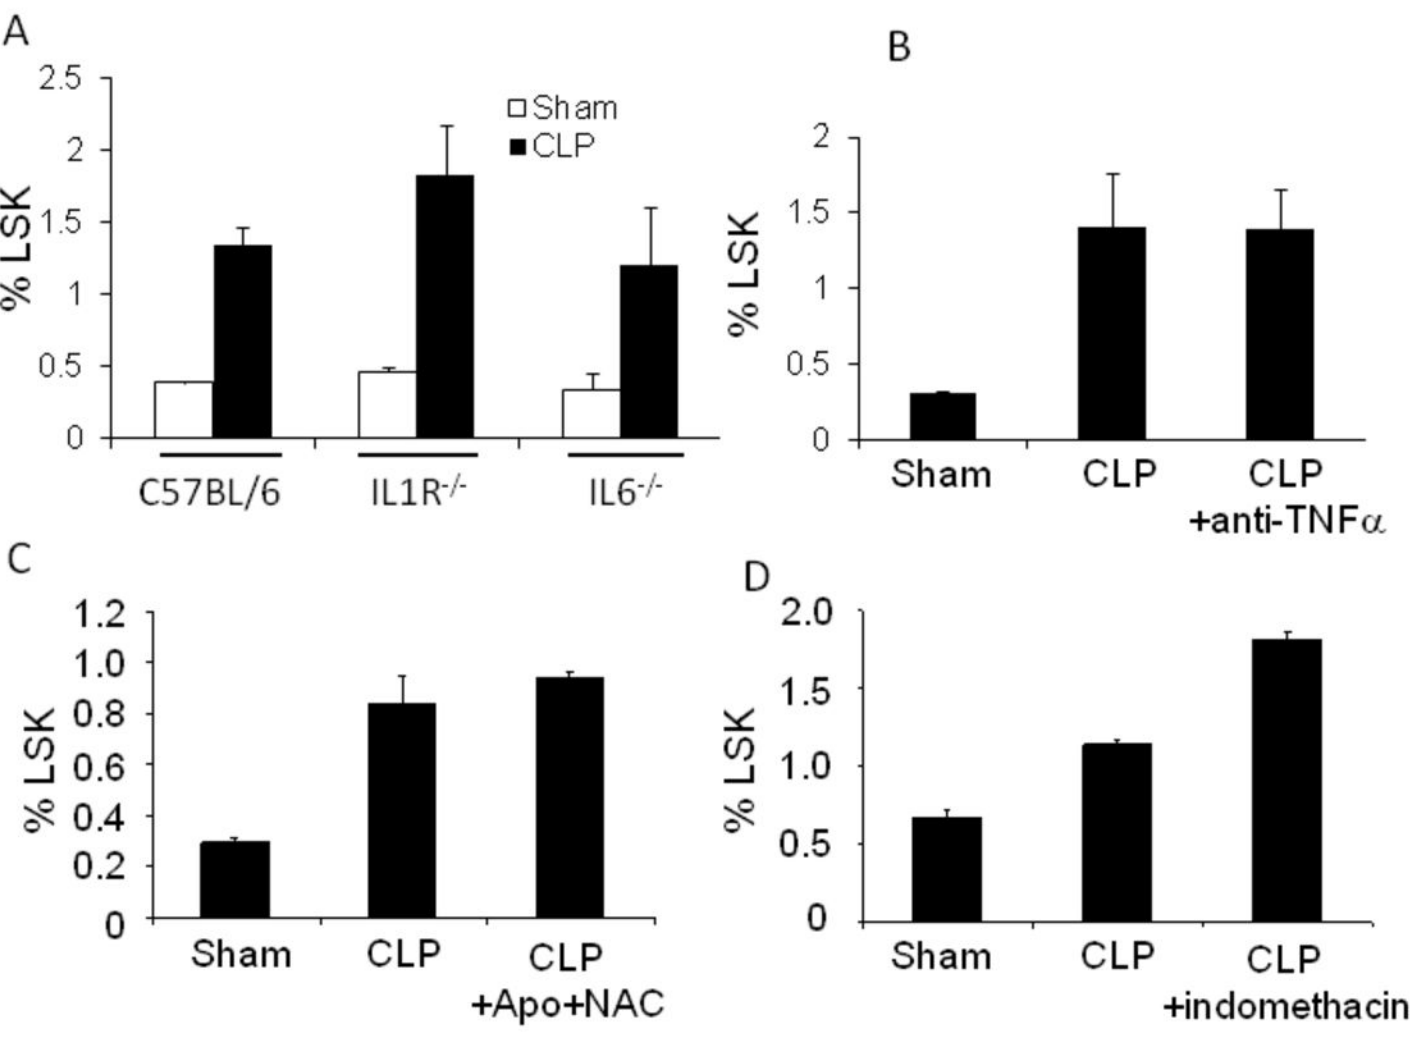

Supplemental Figure 5

A

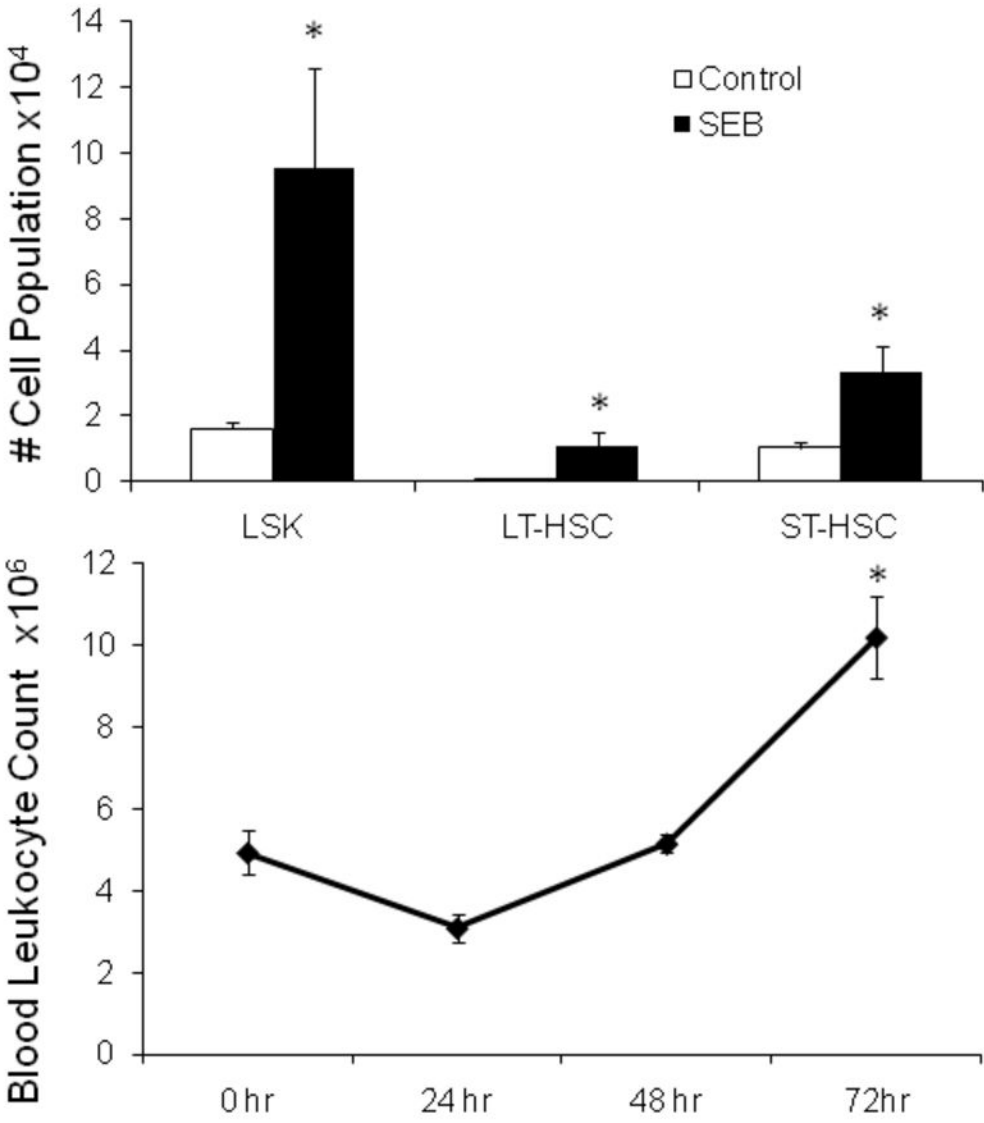

Supplemental Figure 6

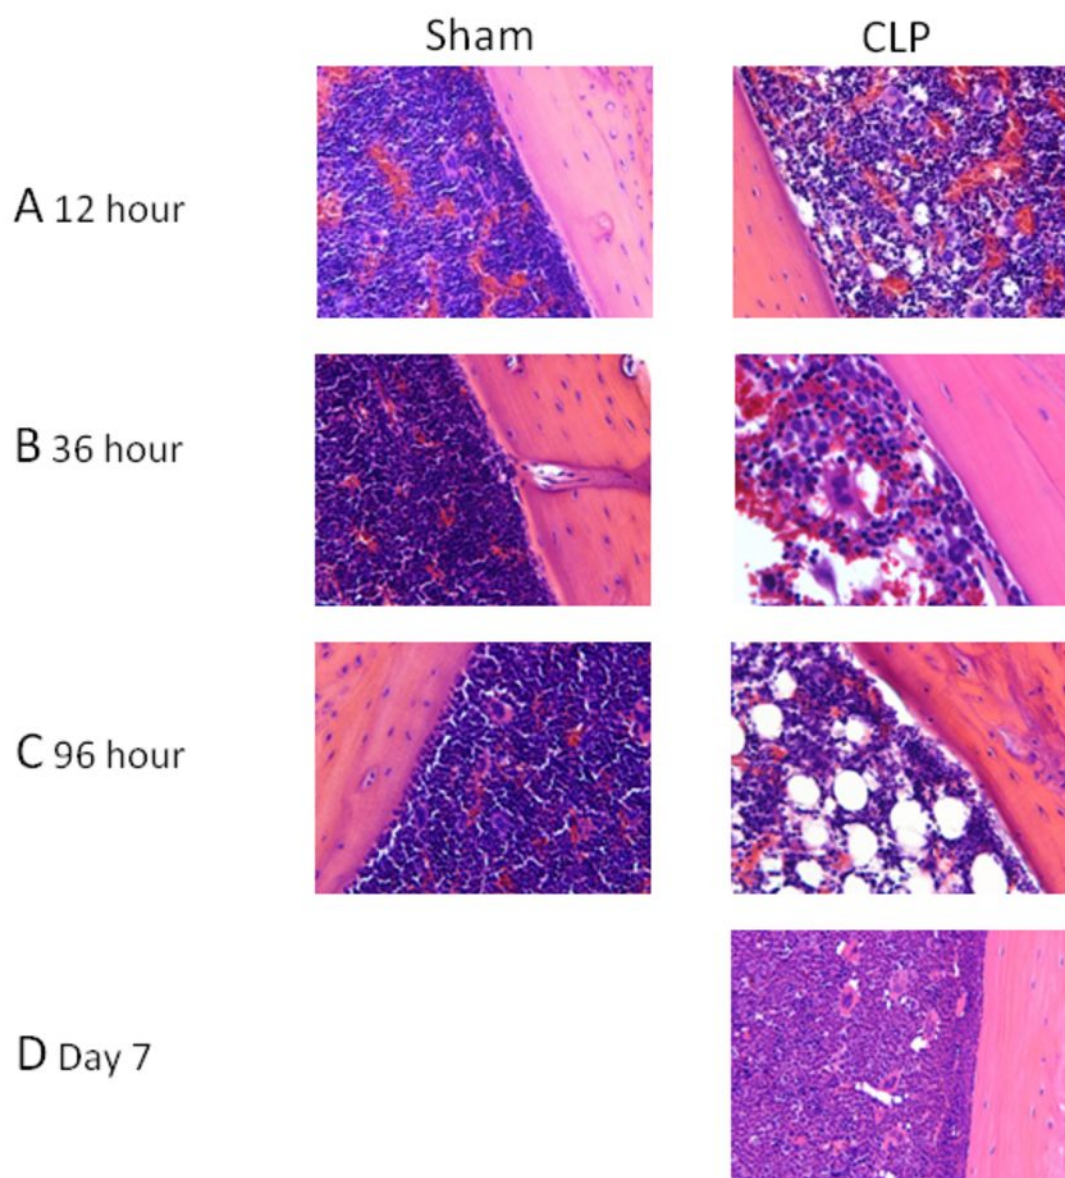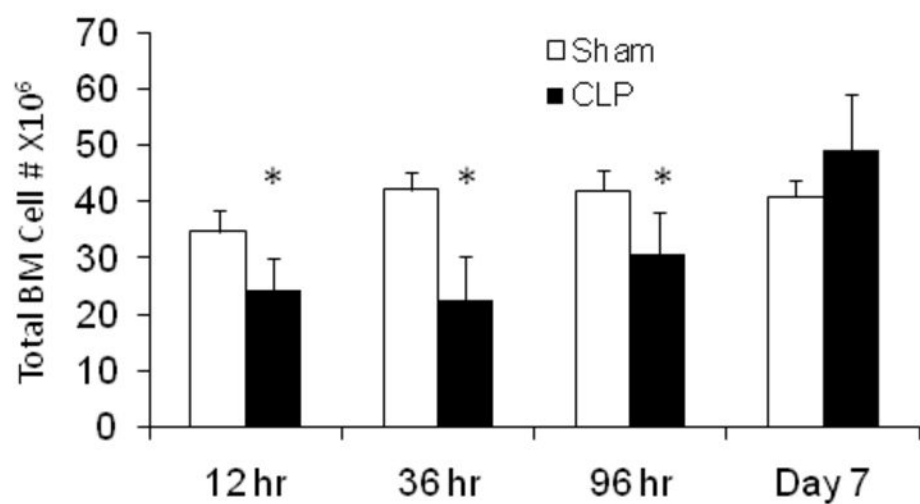

Supplemental Figure 7

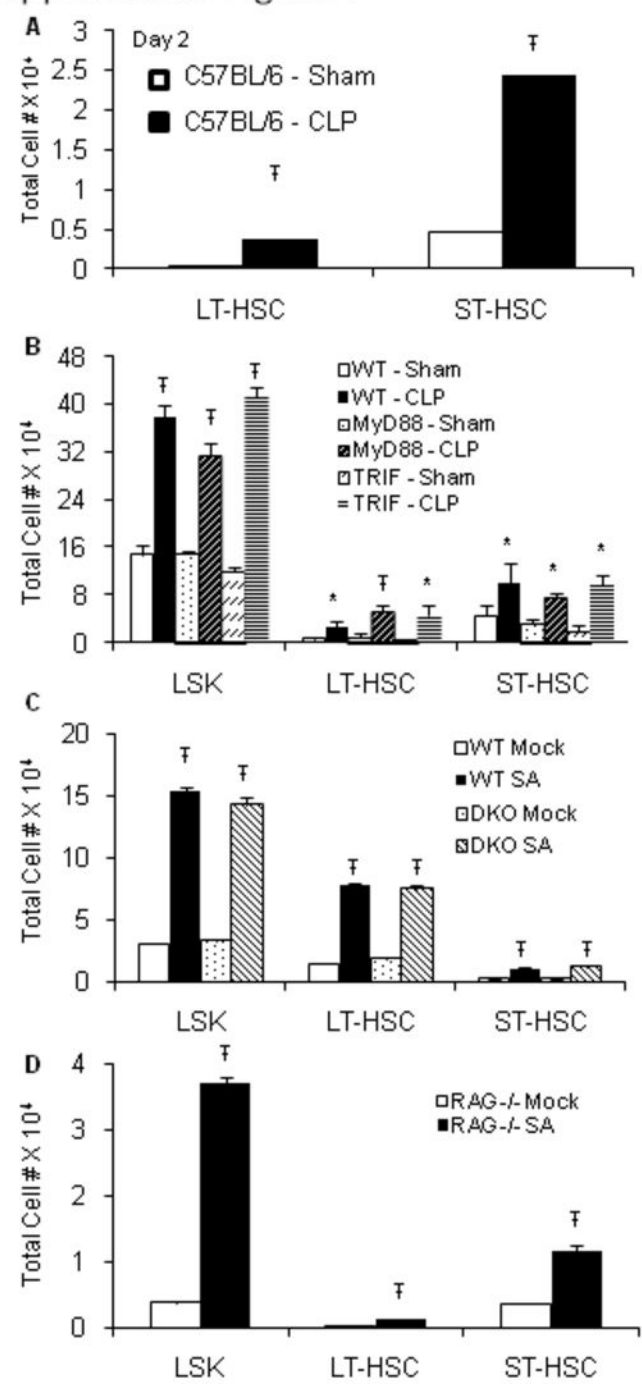

Supplement: NIHMS520443-supplement-Supplemental_Figures_pdf.pdf [file NIHMS520443-supplement-Supplemental_Figures_pdf.pdf]
